# Supplementary material
Source: ML conference proceedings conference paper supplement (https://openaccess.thecvf.com/content/ICCV2023/html/Wang_Structure_Invariant_Transformation_ICCV_2023_paper.html)
Supplement: Supplementary file 2 [file Wang_Structure_Invariant_Transformation_ICCV_2023_supplemental.zip]

Archive with 1 entries (1 files):
- supp.pdf
